# Supplementary material for: Perspectives of diverse Spanish- and English-speaking patients on the clinical use of polygenic risk scores
Source: PubMed Central journal article supplement (PMC10066541; doi:10.1016/j.gim.2022.03.006), 2022-04-05
Supplement: NIHMS1869920-supplement-Supplementary_Material.pdf [file NIHMS1869920-supplement-Supplementary_Material.pdf]

**Perspectives of diverse Spanish- and English-speaking patients on the clinical use of polygenic  
risk scores**

Sabrina A. Suckiel<sup>1,2</sup>, Giovanna T. Braganza<sup>1</sup>, Karla López Aguiñiga<sup>1</sup>, Jacqueline A. Odgis<sup>1</sup>,  
Katherine E. Bonini, Eimear E. Kenny<sup>1,2,3</sup>, Jada G. Hamilton<sup>4,5,6</sup>, Noura S. Abul-Husn<sup>1,2,3</sup>

<sup>1</sup>The Institute for Genomic Health, Icahn School of Medicine at Mount Sinai, New York, NY, USA

<sup>2</sup>Department of Medicine, Icahn School of Medicine at Mount Sinai, New York, NY, USA

<sup>3</sup>Department of Genetics and Genomic Sciences, Icahn School of Medicine at Mount Sinai, New  
York, NY, USA

<sup>4</sup>Department of Psychiatry & Behavioral Sciences, Memorial Sloan Kettering Cancer Center,  
New York, NY, USA

<sup>5</sup>Department of Medicine, Memorial Sloan Kettering Cancer Center, New York, NY, USA

<sup>6</sup>Weill Cornell Medical College, New York, NY, USA

**Supplementary Table 1.** Interview guide domains

|                                                                                                                                                                                                                                                                                                                                                                                                  |
|--------------------------------------------------------------------------------------------------------------------------------------------------------------------------------------------------------------------------------------------------------------------------------------------------------------------------------------------------------------------------------------------------|
| <b>Attitudes towards PRS</b> <ul style="list-style-type: none"><li>• General interest</li><li>• Benefits and harms</li><li>• Health conditions of most and least interest for learning PRS</li><li>• Interest modifiers (e.g., disease severity, treatment availability)</li><li>• Utility and value</li><li>• Concerns</li></ul>                                                                |
| <b>Barriers to access, adoption, and use of PRS</b> <ul style="list-style-type: none"><li>• Challenges in obtaining clinical PRS</li><li>• Challenges in adopting recommendations related to PRS results</li><li>• Recommendations for addressing cited challenges</li></ul>                                                                                                                     |
| <b>Methods for communicating PRS</b> <ul style="list-style-type: none"><li>• Current method for receiving medical test results</li><li>• Preferred method for PRS result delivery</li><li>• Ways to support patient understanding of PRS results</li><li>• Pre-test and post-test information needs</li></ul>                                                                                    |
| <b>Reactions to a hypothetical scenario for hypercholesterolemia PRS; high-risk and not high-risk results</b> <ul style="list-style-type: none"><li>• Interest</li><li>• Utility and value</li><li>• Impact on health behaviors and family communication</li><li>• Reactions to high-risk and not high-risk results</li><li>• Contextualization of high-risk and not high-risk results</li></ul> |

**Supplementary Table 2.** Interest in clinical PRS themes and subthemes

| Themes / Subthemes                                                                                                                                                                                  | Example Quotes                                                                                                                                                                                                                                                                                                                                                                                                                                                                                                                                                                                                                                                                                                                                                                                                                                                                                                                                                                                                               |
|-----------------------------------------------------------------------------------------------------------------------------------------------------------------------------------------------------|------------------------------------------------------------------------------------------------------------------------------------------------------------------------------------------------------------------------------------------------------------------------------------------------------------------------------------------------------------------------------------------------------------------------------------------------------------------------------------------------------------------------------------------------------------------------------------------------------------------------------------------------------------------------------------------------------------------------------------------------------------------------------------------------------------------------------------------------------------------------------------------------------------------------------------------------------------------------------------------------------------------------------|
| <p><b>Knowledge is power</b></p> <p>To guide disease prevention and early detection</p> <p>Empowering and boosts self-efficacy</p> <p>Improve medical care overall</p> <p>Inform family members</p> | <p><i>"...knowledge is power in that regard, so I would want to know so that if I ever started to get symptoms or anything and then all of a sudden, something came up on the horizon I would know about it." (P17, Eng-speaking)</i></p> <p><i>"Any disease that can be solved or can be in that blueprint, if there's a way to manage it, then that's the best way to handle it. This way, it doesn't become a medical problem." (P05, Eng-speaking)</i></p> <p><i>"When you work hard at finding out what's going on with you health wise, I think that gives you an upper edge in taking control of your healthcare needs as well." (P01, Eng-speaking)</i></p> <p><i>"You guys can research and come out with better treatment or a cure if that's what in people lives, because people could feel better moving forward." (P37, Sp-speaking)</i></p> <p><i>"About myself, whatever the results, I just want to help my son, because he is the future, and his future is with his children." (P35, Sp-speaking)</i></p> |
| <p><b>Interest influenced by family health history</b></p>                                                                                                                                          | <p><i>"Alzheimer's, I don't have this in my family, that's why I'm not interested in that subject, but regarding the other diseases, I do have relatives that have a certain disease, so, I'm more interested in this than something I don't know about." (P33, Sp-speaking)</i></p>                                                                                                                                                                                                                                                                                                                                                                                                                                                                                                                                                                                                                                                                                                                                         |
| <p><b>Trust in medical science</b></p> <p>Adoption of PRS would help advance science</p>                                                                                                            | <p><i>"For me to have took the [PRS] test, I would have had to believe in the science first." (P03, Eng-speaking)</i></p> <p><i>"I think that this type of testing can actually basically change how we see medical science." (P01, Eng-speaking)</i></p>                                                                                                                                                                                                                                                                                                                                                                                                                                                                                                                                                                                                                                                                                                                                                                    |

Developing targeted treatments

*"Science should advance at the same pace, so they can treat that genetic deficit, increase it a little bit, and your body would react a lot better." (P37, Sp-speaking)*

Fear of something new or unfamiliar

*"... no one wants to feel like a guinea pig of trying something new and if there's some defect of some sort, no one wants to be the first to go through the side effects." (P08, Eng-speaking)*

---
